# Supplementary material for: Molecular Markers Help with Breeding for Agronomic Traits of Spring Wheat in Kazakhstan and Siberia
Source: MDPI journal article supplement (doi:10.3390/genes15010086), 2024-01-10
Supplement: s1 [file s1]

**Table S1.** The list of material used in the study.

| Entry # | Germplasm name      | Origin                |
|---------|---------------------|-----------------------|
| 1       | Altayskaya zhnitsa  | Altay ARI, RU         |
| 2       | Altayskaya 530      | Altay ARI, RU         |
| 3       | Sibirskiy Aljans    | Altay ARI, RU         |
| 4       | Lutescens 844       | Altay ARI, RU         |
| 5       | Stepnaya volna      | Altay ARI, RU         |
| 6       | Toboljskaya-1       | Altay ARI, RU         |
| 7       | Lutescens 1012      | Altay ARI, RU         |
| 8       | Lut.509             | Altay ARI, RU         |
| 9       | Lutescens 509       | Altay ARI, RU         |
| 10      | Lutescens 1003      | Altay ARI, RU         |
| 11      | Erythrospermum 1119 | Altay ARI, RU         |
| 12      | Lutescens 574       | Altay ARI, RU         |
| 13      | Lutescens 697       | Altay ARI, RU         |
| 14      | Lutescens 665/1     | Altay ARI, RU         |
| 15      | Lutescens 424       | Altay ARI, RU         |
| 16      | Lutescens 716       | Altay ARI, RU         |
| 17      | Velyutinum 15       | East-Kaz.stan ARI, KZ |
| 18      | GVK 1857/9          | East-Kaz.stan ARI, KZ |
| 19      | GVK 1860-12         | East-Kaz.stan ARI, KZ |
| 20      | Lyazzat             | East-Kaz.stan ARI, KZ |
| 21      | Zauljbinka          | East-Kaz.stan ARI, KZ |
| 22      | Novosibirskaya 31   | Siberian ARI, RU      |
| 23      | Novosibirskaya 16   | Siberian ARI, RU      |
| 24      | Sibirskaya 21       | Siberian ARI, RU      |
| 25      | Novosibirskaya 15   | Siberian ARI, RU      |
| 26      | Novosibirskaya 29   | Siberian ARI, RU      |
| 27      | Novosibirskaya 18   | Siberian ARI, RU      |
| 28      | Lutescens 307/97-23 | Siberian ARI, RU      |
| 29      | L. 196/94-6         | Siberian ARI, RU      |
| 30      | Omskaya 37          | Siberian ARI, RU      |
| 31      | Aktobe 1580         | Aktobe AES, KZ        |
| 32      | Asap                | Aktobe AES, KZ        |
| 33      | Stepnaya 259        | Aktobe AES, KZ        |
| 34      | Stepnaya 1509/06    | Aktobe AES, KZ        |
| 35      | Stepnaya 62         | Aktobe AES, KZ        |
| 36      | Ekada 113           | Ekada, RU             |
| 37      | Ekada 85            | Ekada, RU             |
| 38      | Lutescens 1193      | Samara ARI, RU        |
| 39      | L-654               | South-East ARI, RU    |
| 40      | LD-25               | South-East ARI, RU    |
| 41      | Saratovskaya 75     | South-East ARI, RU    |
| 42      | Saratovskaya 29-2   | South-East ARI, RU    |
| 43      | Karagandinskaya-93  | Karagandy AES, KZ     |
| 44      | Lutescens - 1212    | Karagandy AES, KZ     |

|    |                                  |                        |
|----|----------------------------------|------------------------|
| 45 | Lutescens - 1226                 | Karagandy AES, KZ      |
| 46 | Lutescens - 1235                 | Karagandy AES, KZ      |
| 47 | Sary Arka 28 (Лют.1599)          | Karagandy AES, KZ      |
| 48 | Lutescens 1519                   | Karagandy AES, KZ      |
| 49 | Lutescens 1764                   | Karagandy AES, KZ      |
| 50 | Lutescens1082                    | Karagandy AES, KZ      |
| 52 | Lutescens 2102                   | Karagandy AES, KZ      |
| 53 | Lutescens 1350                   | Karagandy AES, KZ      |
| 54 | Lutescens 1501                   | Karagandy AES, KZ      |
| 55 | Lutescens - 1135                 | Karagandy AES, KZ      |
| 56 | Tselinnaya niva                  | Kaz. Grain Center, KZ  |
| 57 | Astana 2                         | Kaz. Grain Center, KZ  |
| 58 | Lutescens 230/00                 | Kaz. Grain Center, KZ  |
| 59 | Shortandinskaya 95 uluchshennaya | Kaz. Grain Center, KZ  |
| 60 | Astana                           | Kaz. Grain Center, KZ  |
| 61 | Tselina 50                       | Kaz. Grain Center, KZ  |
| 64 | 27-90-98-3                       | Pavlodar ARI, KZ       |
| 65 | 53-88-94-12                      | Pavlodar ARI, KZ       |
| 66 | 53-94-98-2                       | Pavlodar ARI, KZ       |
| 67 | Lutescens 53/95-98-1             | Pavlodar ARI, KZ       |
| 68 | Lutescens 9-33                   | Pavlodar ARI, KZ       |
| 69 | Pavlodarskaya 11                 | Pavlodar ARI, KZ       |
| 70 | Samgau                           | Kaz. Farming Inst.     |
| 71 | Aray                             | Kaz. Farming Inst., KZ |
| 72 | Iljinskaya                       | Kaz. Farming Inst., KZ |
| 73 | Lutescens - 70                   | Kaz. Farming Inst., KZ |
| 74 | Yrym                             | Kaz. Farming Inst., KZ |
| 75 | Lutescens 24                     | Kaz. Farming Inst., KZ |
| 76 | Lutescens 715-04                 | Kaz. Farming Inst., KZ |
| 77 | Erythrospermum 727               | Kaz. Farming Inst., KZ |
| 78 | Lutescens 166-СІІ94              | Kaz. Farming Inst., KZ |
| 81 | Kayir G-5454-91                  | Kaz. Farming Inst., KZ |
| 82 | Kaz.stanskaya-3                  | Kaz. Farming Inst., KZ |
| 83 | Nadezhnda                        | Kaz. Farming Inst., KZ |
| 84 | Fiton 109                        | Fiton KZ               |
| 85 | Fiton C 36 ЧС                    | Fiton KZ               |
| 86 | Fiton 43                         | Fiton KZ               |
| 87 | Fiton C 50 ЧС                    | Fiton KZ               |
| 88 | Ekada 148                        | Fiton KZ               |
| 89 | Fiton C-54                       | Fiton KZ               |
| 90 | Fiton 25                         | Fiton KZ               |
| 91 | Fiton 41                         | Fiton KZ               |
| 92 | Fiton 156                        | Fiton KZ               |
| 93 | Fiton C 41 ЧС                    | Fiton KZ               |
| 96 | Lutescens C 19 ЧС                | Karabalyk AES, KZ      |
| 97 | Lutescens 36                     | Karabalyk AES, KZ      |
| 98 | Avgustina                        | Karabalyk AES, KZ      |
| 99 | Liniya-22 ЧС                     | Karabalyk AES, KZ      |

|     |                         |                           |
|-----|-------------------------|---------------------------|
| 100 | Liniya-4-10-16          | Karabalyk AES, KZ         |
| 101 | Lutescens 48-204-03     | Karabalyk AES, KZ         |
| 102 | Lutescens 4             | Karabalyk AES, KZ         |
| 103 | Ayna                    | Karabalyk AES, KZ         |
| 104 | Chelyaba yubileinaya    | Chelyabinsk ARI, RU       |
| 105 | Lutescens 23490         | Chelyabinsk ARI, RU       |
| 106 | Silach                  | Chelyabinsk ARI, RU       |
| 107 | Chebarkul'skaya         | Chelyabinsk ARI, RU       |
| 108 | Pamyati Ryuba           | Chelyabinsk ARI, RU       |
| 109 | Lutescens 22-17         | Kurgan ARI, RU            |
| 110 | Lutescens 37-17         | Kurgan ARI, RU            |
| 111 | P-23-14                 | Kurgan ARI, RU            |
| 112 | Lutescens 106-0/2003    | Kurgan ARI, RU            |
| 113 | Lutescens 120/2003      | Kurgan ARI, RU            |
| 114 | SAD-101                 | Kurgan ARI, RU            |
| 115 | A-125                   | Kurgan ARI, RU            |
| 116 | OK-1                    | Kurgan ARI, RU            |
| 117 | Alfa 79                 | Kurgan ARI, RU            |
| 118 | Lutescens 8-108-1       | Kurgan ARI, RU            |
| 119 | Lutescens 363/96-4      | Kurganseeds, RU           |
| 120 | Lutescens 360/96-6      | Kurganseeds, RU           |
| 121 | Lutescens 205/03-1      | Kurganseeds, RU           |
| 123 | Lutescens KS 14/09-2    | Kurganseeds, RU           |
| 124 | Lutescens KS 140/08-3   | Kurganseeds, RU           |
| 125 | Lutescens 290/99-7      | Kurganseeds, RU           |
| 126 | Liniya-241-00-4         | Kurganseeds, RU           |
| 127 | Lutescens KS 963        | Kurganseeds, RU           |
| 128 | Lutescens 128-05        | Omsk State Agr. Univ., RU |
| 129 | Erythrospermum 85-08    | Omsk State Agr. Univ., RU |
| 130 | Erythrospermum 78       | Omsk State Agr. Univ., RU |
| 131 | Lutescens 89-06         | Omsk State Agr. Univ., RU |
| 132 | Lutescens 126-05        | Omsk State Agr. Univ., RU |
| 133 | Lutescens 96-12         | Omsk State Agr. Univ., RU |
| 134 | OmGAU-100               | Omsk State Agr. Univ., RU |
| 135 | Stolypinskaya 2         | Omsk State Agr. Univ., RU |
| 136 | Chernyava 13            | Omsk State Agr. Univ., RU |
| 137 | Sibakovskaya Yubilenaya | Omsk State Agr. Univ., RU |
| 138 | Lutescens 27-12         | Omsk State Agr. Univ., RU |
| 139 | Tertsiya-1              | Omsk State Agr. Univ., RU |
| 140 | Lutescens 7/04-26       | Omsk Agr. Res. Center, RU |
| 141 | Lutescens 141/03-2      | Omsk Agr. Res. Center, RU |
| 142 | Lut. 3/04-21-11         | Omsk Agr. Res. Center, RU |
| 143 | Lutescens 529/00-10C    | Omsk Agr. Res. Center, RU |
| 144 | Pamyati Azieva          | Omsk Agr. Res. Center, RU |
| 145 | Sigma                   | Omsk Agr. Res. Center, RU |
| 146 | Lutescens 186/04-61     | Omsk Agr. Res. Center, RU |
| 147 | Lutescens 6/04-4        | Omsk Agr. Res. Center, RU |
| 148 | SPChS 69                | Omsk Agr. Res. Center, RU |

|     |              |                           |
|-----|--------------|---------------------------|
| 149 | Omskaya 35-2 | Omsk Agr. Res. Center, RU |
| 150 | Omskaya 41   | Omsk Agr. Res. Center, RU |

**Table S2.** The list of KASP markers used in the study.

| #                         | Gene                       | Marker name                | Allele effect                                   |
|---------------------------|----------------------------|----------------------------|-------------------------------------------------|
| <b>Development rate</b>   |                            |                            |                                                 |
| 1                         | <i>Ppd-A1</i>              | <i>GS105-1117ID</i>        | Ppd-A1b: Photoperiod insensitive                |
| 2*                        | <i>PRR73-A1</i>            | <i>PRR73A1-9IND</i>        | Hap-II: Late flower                             |
| 3                         | <i>PRR73-B1</i>            | <i>PRR73B1-4558</i>        | Hap-II: Early flower                            |
| 4                         | <i>TaELF3-D1</i>           | <i>FT3-Exon4_A/G</i>       | Savanah-type: Early flower                      |
| 5*                        | <i>TaMOT1-D1</i>           | <i>TaMOT1-D1_KASP1</i>     | Wild-type: Early flower                         |
| 6                         | <i>Ppd-B1</i>              | <i>TaPpdBJ001</i>          | Ppd-B1b: Photoperiod sensitive                  |
| 7                         | <i>Ppd-D1</i>              | <i>TaPpdDD001</i>          | Ppd-D1b: Photoperiod sensitive (Late flowering) |
| 8*                        | <i>Ppd- D1</i>             | <i>TaPpdDD002</i>          | Del: Early flower                               |
| 9*                        | <i>Vrn-A1</i>              | <i>Vrn1_new</i>            | Vrn-A1a spring: Spring-type early flower        |
| 10*                       | <i>Vrn-A1</i>              | <i>Vrn-A1_9K0001</i>       | 2147-type: Long vern                            |
| 11*                       | <i>Vrn-A1</i>              | <i>Exon7_C/T_Vrn-A1</i>    | Hereward-type: Late flower                      |
| 12*                       | <i>Vrn-B1</i>              | <i>wMAS000037</i>          | Vrn-B1a-c: Early flower                         |
| 13*                       | <i>Vrn-D1</i>              | <i>Vrn-D1-D1a_A</i>        | vrn-D1: Late flower                             |
| <b>Disease resistance</b> |                            |                            |                                                 |
| 14                        | <i>Excalibur_c7282_512</i> | <i>Excalibur_c7282_512</i> | A: Fhb sus                                      |
| 15                        | <i>Fhb1</i>                | <i>Fhb1_KSU</i>            | Fhb1- : Fhb1 gene absent                        |
| 16*                       | <i>QSr.icarda-7A.1</i>     | <i>IWAB8036</i>            | A: Ug99 res                                     |
| 17                        | <i>QSr.icarda-7A.2</i>     | <i>IWB30995</i>            | C: Ug99 res                                     |
| 18                        | <i>QSr.icarda-7A.3</i>     | <i>IWB46162</i>            | T: Ug99 sus                                     |
| 19*                       | <i>QSr.icarda-7A.4</i>     | <i>IWB58668</i>            | G: Ug99 res                                     |
| 20                        | <i>Kukri_c36639_186</i>    | <i>Kukri_c36639_186</i>    | Fusarium head blight                            |
| 21*                       | <i>Lr34</i>                | <i>Lr34_TCCIND</i>         | Lr34-: Lr34 gene absent                         |
| 22                        | <i>Lr37</i>                | <i>VPM_SNP</i>             | Lr37-: Lr37 gene absent                         |
| 23*                       | <i>Lr46</i>                | <i>Lr46_JF2-2A</i>         | Lr46-: Lr46 gene absent                         |
| 24                        | <i>Lr47</i>                | <i>Lr47</i>                | Lr47-: Lr47 gene absent                         |
| 25                        | <i>Lr67</i>                | <i>TM4_67</i>              | Lr67-: Lr67 gene absent                         |
| 26*                       | <i>Lr68</i>                | <i>Lr68-2</i>              | Lr68-: Lr68 gene absent                         |
| 27                        | <i>Lr9</i>                 | <i>Wsnp1Lr9</i>            | Lr9-: Lr9 gene absent                           |
| 28                        | <i>Pch1</i>                | <i>wMAS000023</i>          | Pch1-: Eye spot resistance gene absent          |
| 29                        | <i>Sbm1</i>                | <i>wMAS000016</i>          | Sbm1-: Soil born mosaic virus gene absent       |
| 30                        | <i>SrCad</i>               | <i>snpTA0035</i>           | SrCad, Sr42, SrTmp-: Absent                     |
| 31                        | <i>Sr2</i>                 | <i>wMAS000005</i>          | Sr2-: Sr2 gene absent                           |

|                          |                         |                                           |                                          |
|--------------------------|-------------------------|-------------------------------------------|------------------------------------------|
| 32                       | <i>Sr36</i>             | <i>wMAS000015</i>                         | Sr36-: Sr36 gene absent                  |
| 33                       | <i>Tsn1</i>             | <i>Tsn1</i>                               | Tsn1-: Tan spot resistance gene absent   |
| 34                       | <i>Yr5</i>              | <i>Wsnp1Yr5</i>                           | Yr5                                      |
| 35                       | <i>Yr57</i>             | <i>BS00062676</i>                         | Yr57-: Yr57 gene absent                  |
| 36                       | <i>Zds-A1</i>           | <i>Zds-A1</i>                             | TaZds-A1a: Low YPC                       |
| <b>Grain quality</b>     |                         |                                           |                                          |
| 37                       | <i>GCP</i>              | <i>GCP_DUP</i>                            | Gpc-B1-: Low grain protein contents      |
| 38                       | <i>Glu-A1</i>           | <i>gluA1.1_1883_ALA</i>                   | Null: Low quality                        |
| 39                       | <i>Glu-D1</i>           | <i>Glu-D1d_SNP</i>                        | 2+12: Weak gluten                        |
| 40                       | <i>Pinb-D1</i>          | <i>Pinb-D1_INS</i>                        | Pinb-D1b: Hard                           |
| 41                       | <i>PPO-D1</i>           | <i>PPO-D1_SNP</i>                         | Ppo-D1a: Low PPO                         |
| <b>Height</b>            |                         |                                           |                                          |
| 42*                      | <i>Rht8</i>             | <i>Rht8</i>                               | Rht8a: Tall                              |
| 43                       | <i>Rht-B1</i>           | <i>wMAS000001</i>                         | Rht-B1b: Short                           |
| 44                       | <i>Rht-D1</i>           | <i>Rht-D1_SNP</i>                         | Rht-D1b: Short                           |
| <b>Insect resistance</b> |                         |                                           |                                          |
| 45                       | <i>QNr.icarda-7B</i>    | <i>Bobwhite_rep_c66630_331</i>            | A: Nematode res                          |
| 46                       | <i>Ei1</i>              | <i>BS00022785</i>                         | T: Sunn pest sus                         |
| 47                       | <i>Cre8</i>             | <i>Cre8_SNP</i>                           | Cre8-: Soil born disease gene absent     |
| 48                       | <i>QNr.icarda-2B</i>    | <i>Excalibur_c18966_804</i>               | A: Nematode sus                          |
| 49                       | <i>QNr.icarda-5B.1</i>  | <i>Excalibur_c78724_434</i>               | A: Nematode res                          |
| 50                       | <i>Ei1</i>              | <i>IWB66138</i>                           | G: Sunn pest res                         |
| 51                       | <i>Rlnn1</i>            | <i>Rlnn1</i>                              | Rlnn-: Root leision nematode gene absent |
| 52                       | <i>QNr.icarda-5B.2</i>  | <i>Tdurum_contig10380_87</i>              | A: Nematode res                          |
| 53                       | <i>QNr.icarda-4A.1</i>  | <i>Tdurum_contig82236_117</i>             | A: Nematode res                          |
| 54                       | <i>QNr.icarda-3A</i>    | <i>wsnp_BE426418A-Ta_2_1</i>              | C: Nematode sus                          |
| 55                       | <i>QNr.icarda-1A</i>    | <i>wsnp_BE443588A-Ta_2_1</i>              | G: Nematode sus                          |
| 56                       | <i>QNr.icarda-4A.2</i>  | <i>wsnp_Ex_c55245_57821389</i>            | C: Nematode res                          |
| <b>Morphology</b>        |                         |                                           |                                          |
| 57                       | <i>QAwns.icarda-5AL</i> | <i>BobWhite_C8266_227_TG_5AL</i>          | G: Awned                                 |
| 58                       | <i>Tamby10-A1</i>       | <i>Tamby10-A1</i>                         | R-A1b: Red grain color allele            |
| 59                       | <i>Tamyb-B1</i>         | <i>TamybR B1a-b_C</i>                     | R-B1b: Red grain color allele            |
| <b>Yield</b>             |                         |                                           |                                          |
| 60*                      | <i>1B.1R</i>            | <i>wMAS000011</i>                         | 1B.1R: rye translocation                 |
| 61*                      | <i>Dreb-B1</i>          | <i>Dreb1_JC_3BL</i>                       | TaDREB-B1b: Drought susceptible allele   |
| 62*                      | <i>QYld.icarda-4A</i>   | <i>ISBW11-GY, wsnp_Ex_c12812_20324622</i> | T: Lower yield                           |

|                         |                        |                                                         |                                    |
|-------------------------|------------------------|---------------------------------------------------------|------------------------------------|
| 63*                     | <i>QYld.icarda-5A</i>  | <i>ISBW1-GY,</i><br><i>wsnp_Ex_c2526_4715978</i>        | G: Higher yield                    |
| 64*                     | <i>QYld.icarda-3B</i>  | <i>ISNW2-GY, Kukri_c3243_1065</i>                       | C: Lower yield                     |
| 65*                     | <i>TaCwi-4A</i>        | <i>TaCwi-4A</i>                                         | Hap-4A-T: Low yield under drought  |
| 66                      | <i>TaCwi-5D</i>        | <i>TaCwi-5D</i>                                         | Hap-5D-G: Low yield iunder drought |
| <b>Yield components</b> |                        |                                                         |                                    |
| 67*                     | <i>QSm2.icarda-5A</i>  | <i>ISBW10-SM2, BS00076246_51</i>                        | G: Higher spike number             |
| 68*                     | <i>QBm.icarda-1B.1</i> | <i>ISBW3-BM, TA004946-0577</i>                          | C: Higher biomass                  |
| 69                      | <i>QBm.icarda-1B.2</i> | <i>ISBW4-BM,</i><br><i>Excalibur_c11980_619</i>         | T: Higher biomass                  |
| 70*                     | <i>QGps.icarda-4A</i>  | <i>ISBW7-GPS,</i><br><i>wsnp_Ex_rep_c66324_64493429</i> | T: Higher grains per spike         |
| 71*                     | <i>QSm2.icarda-5B</i>  | <i>ISBW9-SM2,</i><br><i>Excalibur_c71712_180</i>        | T: Higher spike number             |
| <b>TKW</b>              |                        |                                                         |                                    |
| 72*                     | <i>TaGS5-A1</i>        | <i>GS5-2334-SNP</i>                                     | TaGS5-A1b: High grain size         |
| 73                      | <i>TaGW2-6B</i>        | <i>GW2-6B</i>                                           | Hap-III: Low TGW                   |
| 74                      | <i>QTKw.icarda-3A</i>  | <i>IBSW5-TKW, BS00057445_51</i>                         | G: Lower TKW                       |
| 75                      | <i>TaSus2-2B</i>       | <i>wMAS000021</i>                                       | Hap-H: High TGW                    |
| 76*                     | <i>TaGS-D1</i>         | <i>TaGS-D1</i>                                          | TaGD-D1b                           |
| 77                      | <i>TaSus1-7B</i>       | <i>Sus1-7B-2932IND</i>                                  | Hap-C: Low TGW                     |
| 78                      | <i>TaSus2-2A</i>       | <i>TaSus2-2A</i>                                        | Hap-A: High TGW                    |
| 79                      | <i>TaSus-7A</i>        | <i>TaSus-7A</i>                                         | TaSus-7A-2: High TGW               |
| 80*                     | <i>TEF-7A</i>          | <i>TEF-7A</i>                                           | Hap-7A-1, 2: Lower TKW             |
| 81                      | <i>TPP-6A_AL1</i>      | <i>TPP-6A_AL1</i>                                       | TPP-6AL1b: Low TGW                 |

\* - markers used in the study.

**Table S3.** Grain yield and agronomic traits at three experimental sites in 2020-2022.

| Site                           | Year         | Plant height, cm | Spike length, cm | Grains per spike | Grain weight per spike, g | 1000 kernel weight, g | Grain yield, g/m <sup>2</sup> |
|--------------------------------|--------------|------------------|------------------|------------------|---------------------------|-----------------------|-------------------------------|
| Omsk State Agrarian University | 2020         | 91.5             | 9.3              | 36.2             | 1.52                      | 41.9                  | 366                           |
|                                | 2021         | 89.5             | 10.0             | 35.5             | 1.40                      | 39.5                  | 569                           |
|                                | 2022         | 87.1             | 9.2              | 35.7             | 1.51                      | 42.1                  | 388                           |
|                                | Mean (21-22) | 88.3             | 9.6              | 35.6             | 1.46                      | 40.8                  | 478                           |
| Karabalyk Agric. Exp. Station  | 2020         | 69.7             | 8.1              | 28.6             | 1.01                      | 35.4                  | 165                           |
|                                | 2021         | -                | 6.0              | 23.7             | 0.75                      | 29.8                  | 118                           |
|                                | 2022         | 75.2             | 7.4              | 27.3             | 1.05                      | 33.2                  | 239                           |
|                                | Mean (21-22) | 72.5             | 6.7              | 25.5             | 0.90                      | 31.5                  | 178                           |
| Kaz. Grain Res. Center         | 2020         | -                | 7.3              | 26.6             | 0.91                      | 35.0                  | 161                           |
|                                | 2021         | 65.1             | 7.3              | 28.2             | 0.93                      | 35.6                  | 183                           |
|                                | 2022         | 56.4             | 6.6              | 25.3             | 0.78                      | 35.9                  | 248                           |
|                                | Mean (21-22) | 60.8             | 7.0              | 26.8             | 0.86                      | 35.8                  | 215                           |
| North Kaz. AES                 | 2021         | 58.5             | 8.0              | 26.4             | 1.02                      | 36.8                  | 163                           |
|                                | 2022         | 74.5             | 7.1              | 21.8             | 1.16                      | 41.3                  | 336                           |
|                                | Mean (21-22) | 66.5             | 7.6              | 24.1             | 1.09                      | 39.1                  | 249                           |



**Table S4.** ANOVA results for grain yield and agronomic traits at three experimental sites in 2020-2022.

| Main effects and interactions | Probability values for main effects and interaction for the following traits: |              |                  |                        |                    |             |
|-------------------------------|-------------------------------------------------------------------------------|--------------|------------------|------------------------|--------------------|-------------|
|                               | Plant height                                                                  | Spike length | Grains per spike | Grain weight per spike | 1000 kernel weight | Grain yield |
| Genotype                      | <0.001                                                                        | <0.001       | <0.001           | <0.001                 | <0.001             | <0.001      |
| Site                          | <0.001                                                                        | <0.001       | <0.001           | <0.001                 | <0.001             | <0.001      |
| Year                          | <0.001                                                                        | <0.001       | <0.001           | <0.001                 | <0.001             | <0.001      |
| Genotypes x Sites             | <0.001                                                                        | <0.001       | <0.001           | <0.001                 | <0.01              | <0.001      |
| Genotypes x Years             | 0.638                                                                         | 0.165        | 0.433            | 0.381                  | <0.001             | 0.572       |
| Sites x Years                 | <0.001                                                                        | <0.001       | <0.001           | <0.001                 | <0.001             | <0.001      |

**Table S5.** Grain yield (BLUEs), number of days to heading (original data), TKW (BLUEs) and presence of effective molecular markers in KASIB core set.

| №                                  | VARIETY-ENG         | ORIGIN-<br>INSTITUTE  | Grain yield,<br>g/m <sup>2</sup> | Days to<br>heading | TKW,<br>g | 1B.1<br>R | TaMOT1-<br>D1-Ria | vrn-<br>A1 | TaGS-<br>D1 | ISBW10-<br>SM2-G | ISBW2-<br>GY-C | ISBW3-<br>BM-C | ISBW11-<br>GY-T |
|------------------------------------|---------------------|-----------------------|----------------------------------|--------------------|-----------|-----------|-------------------|------------|-------------|------------------|----------------|----------------|-----------------|
| Early heading group (35-39.9 days) |                     |                       |                                  |                    |           |           |                   |            |             |                  |                |                |                 |
| 27                                 | Novosibirskaya 18   | Novosibirsk<br>ARI    | 273                              | 39.6               | 34.3      | -         | -                 | -          | +           | +                | -              | -              | -               |
| 78                                 | Lutescens 166-CII94 | Kaz. Farming<br>Inst. | 272                              | 39.5               | 42.7      | -         | +                 | -          | +           | +                | +              | +              | +               |
| 12<br>7                            | Lutescens KS 963    | Kurganseeds           | 270                              | 39.8               | 33.6      | -         | -                 | -          | +           | +                | -              | +              | +               |
| 38                                 | Lutescens 1193      | Samara ARI            | 267                              | 39.3               | 34.1      | -         | -                 | -          | +           | +                | +              | -              | +               |
| 52                                 | Lutescens 2102      | Karagandy<br>ARI      | 263                              | 39.7               | 38.1      | -         | +                 | -          | +           | +                | -              | +              | -               |
| 54                                 | Lutescens 1501      | Karagandy<br>ARI      | 260                              | 39.8               | 34.8      | -         | -                 | -          | -           | +                | +              | +              | -               |
| 31                                 | Aktobe 1580         | Aktobe AES            | 258                              | 39.8               | 41.3      | -         | -                 | -          | +           | +                | +              | +              | +               |
| 60                                 | Astana              | Kaz. Grain<br>Inst.   | 254                              | 39.9               | 32.8      | -         | +                 | -          | +           | +                | -              | +              | +               |
| 14<br>4                            | Pamyati Azieva      | Siberian ARI          | 253                              | 39.1               | 36.0      | -         | -                 | -          | +           | +                | +              | +              | +               |
| 91                                 | Fiton 41            | Fiton                 | 252                              | 38.9               | 39.2      | -         | -                 | -          | -           | +                | n.a.           | -              | -               |
| 13<br>5                            | Stolypinskaya 2     | Omsk SAU              | 248                              | 39.8               | 39.4      | -         | n.a.              | -          | +           | +                | +              | +              | +               |
| 42                                 | Saratovskaya 29-2   | South-East<br>ARI     | 246                              | 38.8               | 36.2      | -         | +                 | -          | +           | +                | +              | +              | +               |
| 20                                 | Lyazzat             | East-Kaz. ARI         | 245                              | 39.9               | 36.3      | -         | -                 | -          | +           | +                | +              | +              | n.a.            |
| 71                                 | Aray                | Kaz. Farming<br>Inst. | 236                              | 38.7               | 37.3      | -         | +                 | -          | -           | -                | +              | +              | +               |
| 92                                 | Fiton 156           | Fiton                 | 234                              | 39.3               | 35.1      | -         | -                 | -          | +           | -                | +              | +              | -               |
| 25                                 | Novosibirskaya 15   | Novosibirsk<br>ARI    | 229                              | 35.0               | 32.7      | -         | +                 | -          | +           | +                | +              | +              | -               |
| 32                                 | Asap                | Aktobe AES            | 227                              | 37.8               | 37.0      | -         | -                 | -          | +           | +                | +              | +              | +               |
| 29                                 | L. 196/94-6         | Novosibirsk<br>ARI    | 225                              | 38.5               | 40.5      | -         | -                 | -          | +           | +                | -              | +              | +               |
| 73                                 | Lutescens - 70      | Kaz. Farming<br>Inst. | 220                              | 38.0               | 39.5      | -         | -                 | -          | +           | +                | +              | -              | -               |

|                                         |                      |                    |     |      |      |   |   |   |   |   |   |   |      |
|-----------------------------------------|----------------------|--------------------|-----|------|------|---|---|---|---|---|---|---|------|
| 11<br>1                                 | P-23-14              | Kurgan ARI         | 218 | 39.3 | 33.1 | - | + | - | - | + | + | + | -    |
| 11<br>7                                 | Alfa 79              | Kurgan ARI         | 211 | 36.3 | 35.1 | - | - | - | + | + | + | + | n.a. |
| 26                                      | Novosibirskaya 29    | Novosibirsk ARI    | 208 | 38.4 | 34.1 | - | + | - | + | + | + | + | -    |
| 74                                      | Yrym                 | Kaz. Farming Inst. | 197 | 38.5 | 36.1 | - | - | - | - | - | + | - | -    |
| 23                                      | Novosibirskaya 16    | Novosibirsk ARI    | 188 | 35.0 | 34.5 | - | + | - | + | + | + | - | -    |
| Intermediate heading group (40-44 days) |                      |                    |     |      |      |   |   |   |   |   |   |   |      |
| 41                                      | Saratovskaya 75      | Saratov ARI        | 317 | 40.8 | 37.5 | - | - | - | + | + | - | + | -    |
| 11<br>0                                 | Lutescens 37-17      | Kurgan ARI         | 313 | 43.7 | 40.3 | + | - | - | + | + | + | + | +    |
| 36                                      | Ekada 113            | Ekada              | 311 | 42.5 | 39.5 | - | + | - | + | + | + | + | -    |
| 12<br>6                                 | Liniya-241-00-4      | Kurganseeds        | 306 | 43.3 | 38.1 | + | + | - | - | + | + | - | +    |
| 13<br>0                                 | Erythrospermum 78    | Omsk SAU           | 305 | 40.5 | 34.8 | - | + | - | - | + | - | + | +    |
| 14<br>6                                 | Lutescens 186/04-61  | Siberian ARI       | 302 | 43.5 | 39.0 | + | + | - | + | + | + | + | +    |
| 49                                      | Lutescens 1764       | Karagandy ARI      | 300 | 43.0 | 38.4 | - | + | + | + | + | + | + | +    |
| 13<br>2                                 | Lutescens 126-05     | Omsk SAU           | 299 | 41.2 | 36.7 | - | + | - | - | + | - | + | +    |
| 70                                      | Samgau               | Kaz. Farming Inst. | 297 | 42.2 | 40.6 | - | - | - | + | + | - | - | -    |
| 28                                      | Lutescens 307/97-23  | Novosibirsk ARI    | 297 | 43.6 | 36.8 | + | + | - | + | - | + | + | +    |
| 14<br>8                                 | SPChS 69             | Siberian ARI       | 296 | 43.0 | 39.0 | - | + | - | + | + | + | - | -    |
| 50                                      | Lutescens1082        | Karagandy ARI      | 296 | 43.4 | 40.0 | - | + | + | + | + | + | + | +    |
| 11<br>6                                 | OK-1                 | Kurgan ARI         | 293 | 41.8 | 39.9 | + | - | - | + | + | + | + | +    |
| 11<br>2                                 | Lutescens 106-0/2003 | Kurgan ARI         | 293 | 42.2 | 36.3 | - | + | + | - | - | + | + | -    |
| 68                                      | Lutescens 9-33       | Pavlodar ARI       | 290 | 42.0 | 37.2 | - | + | + | - | - | + | + | -    |
| 11<br>5                                 | A-125                | Kurgan ARI         | 290 | 41.0 | 35.2 | - | + | - | + | + | + | - | -    |
| 18                                      | GVK 1857/9           | East-Kaz. ARI      | 288 | 43.7 | 39.2 | - | + | + | + | - | + | - | +    |

|     |                         |                    |     |      |      |   |      |      |   |   |      |   |   |
|-----|-------------------------|--------------------|-----|------|------|---|------|------|---|---|------|---|---|
| 107 | Chebarkul'skaya         | Chelyabinsk ARI    | 288 | 42.1 | 38.7 | - | -    | -    | + | + | +    | - | + |
| 1   | Altayskaya zhnytsa      | Altay ARI          | 288 | 41.9 | 37.7 | - | +    | -    | + | + | +    | - | + |
| 131 | Lutescens 89-06         | Omsk SAU           | 287 | 41.6 | 36.3 | - | +    | -    | - | + | -    | + | - |
| 119 | Lutescens 363/96-4      | Kurganseeds        | 286 | 43.7 | 38.2 | + | +    | -    | + | + | +    | + | + |
| 118 | Lutescens 8-108-1       | Kurgan ARI         | 286 | 42.6 | 34.8 | - | n.a. | -    | + | + | -    | + | - |
| 123 | Lutescens KS 14/09-2    | Kurganseeds        | 286 | 43.4 | 38.0 | + | -    | -    | - | + | -    | + | + |
| 33  | Stepnaya 259            | Aktobe AES         | 283 | 41.6 | 37.5 | - | -    | -    | - | + | +    | + | - |
| 102 | Lutescens 4             | Karabalyk AES      | 283 | 43.0 | 36.4 | - | +    | +    | - | - | +    | + | - |
| 106 | Silach                  | Chelyabinsk ARI    | 280 | 43.9 | 39.5 | + | +    | -    | + | + | +    | + | + |
| 129 | Erythrospermum 85-08    | Omsk SAU           | 279 | 43.6 | 36.2 | + | +    | -    | + | + | n.a. | + | + |
| 57  | Astana 2                | Kaz. Grain Inst.   | 278 | 40.5 | 39.0 | - | +    | -    | + | + | +    | + | - |
| 125 | Lutescens 290/99-7      | Kurganseeds        | 278 | 43.9 | 38.9 | + | +    | -    | - | + | +    | + | + |
| 58  | Lutescens 230/00        | Kaz. Grain Inst.   | 278 | 42.9 | 39.4 | - | +    | -    | + | + | +    | + | + |
| 47  | Sary Arka 28 (Лют.1599) | Karagandy ARI      | 278 | 43.1 | 36.3 | - | +    | +    | - | + | +    | + | + |
| 113 | Lutescens 120/2003      | Kurgan ARI         | 276 | 40.3 | 37.0 | - | +    | -    | + | + | +    | + | + |
| 48  | Lutescens 1519          | Karagandy ARI      | 276 | 42.7 | 40.4 | - | +    | +    | + | + | +    | + | + |
| 77  | Erythrospermum 727      | Kaz. Farming Inst. | 275 | 43.9 | 38.7 | - | +    | +    | - | - | +    | + | + |
| 140 | Lutescens 7/04-26       | Siberian ARI       | 275 | 43.5 | 36.7 | + | +    | -    | - | + | -    | + | + |
| 138 | Lutescens 27-12         | Omsk SAU           | 274 | 42.8 | 39.1 | - | +    | -    | + | + | +    | - | - |
| 14  | Lutescens 665/1         | Altay ARI          | 274 | 41.8 | 36.5 | - | +    | n.a. | + | + | -    | - | + |
| 109 | Lutescens 22-17         | Kurgan ARI         | 273 | 43.3 | 39.3 | + | -    | -    | - | + | +    | + | + |
| 43  | Karagandinskaya-93      | Karagandy ARI      | 273 | 40.8 | 36.1 | - | +    | -    | + | + | +    | + | + |
| 65  | 53-88-94-12             | Pavlodar ARI       | 272 | 41.0 | 36.1 | - | -    | -    | + | + | +    | + | + |

|         |                                                                         |                  |     |      |      |   |      |   |   |   |   |   |   |
|---------|-------------------------------------------------------------------------|------------------|-----|------|------|---|------|---|---|---|---|---|---|
| 61      | Tselina 50                                                              | Kaz. Grain Inst. | 271 | 40.2 | 36.7 | - | +    | - | + | + | + | + | - |
| 64      | 27-90-98-3                                                              | Pavlodar ARI     | 269 | 40.3 | 37.8 | - | n.a. | - | - | + | - | + | - |
| 85      | Fiton C 36 ЧС                                                           | Fiton            | 269 | 42.0 | 40.4 | - | -    | - | + | + | + | - | - |
| 66      | 53-94-98-2                                                              | Pavlodar ARI     | 269 | 40.9 | 37.9 | - | +    | - | + | + | + | + | + |
| 11<br>4 | SAD-101                                                                 | Kurgan ARI       | 269 | 41.9 | 37.3 | - | -    | - | + | + | + | + | + |
| 88      | Ekada 148                                                               | Fiton            | 266 | 42.4 | 38.0 | - | n.a. | - | + | + | - | + | - |
| 35      | Stepnaya 62                                                             | Aktobe AES       | 265 | 40.3 | 37.3 | - | n.a. | - | - | + | - | + | - |
| 12<br>4 | Lutescens KS 140/08-3                                                   | Kurganseeds      | 265 | 42.6 | 36.4 | + | +    | - | + | + | - | + | + |
| 19      | GVK 1860-12                                                             | East-Kaz. ARI    | 264 | 43.5 | 36.2 | - | +    | + | + | - | + | - | + |
| 59      | Shortandinskaya 95 <ul style="list-style-type: none">uluchshennaya</ul> | Kaz. Grain Inst. | 263 | 43.0 | 39.2 | - | +    | - | + | + | + | + | + |
| 10<br>1 | Lutescens 48-204-03                                                     | Karabalyk AES    | 263 | 41.4 | 38.8 | - | -    | - | + | + | + | - | + |
| 24      | Sibirskaya 21                                                           | Novosibirsk ARI  | 262 | 40.9 | 36.3 | - | -    | - | + | + | + | - | - |
| 14<br>7 | Lutescens 6/04-4                                                        | Siberian ARI     | 261 | 43.9 | 38.4 | + | +    | - | + | + | + | - | + |
| 37      | Ekada 85                                                                | Ekada            | 261 | 40.6 | 31.3 | - | +    | + | + | + | + | - | + |
| 90      | Fiton 25                                                                | Fiton            | 260 | 42.8 | 38.3 | + | -    | - | + | + | + | - | - |
| 45      | Lutescens - 1226                                                        | Karagandy ARI    | 259 | 41.0 | 38.7 | - | -    | + | + | + | + | + | + |
| 30      | Omskaya 37                                                              | Novosibirsk ARI  | 259 | 42.0 | 36.2 | + | +    | - | + | + | - | + | + |
| 15      | Lutescens 424                                                           | Altay ARI        | 258 | 40.6 | 37.9 | - | -    | + | + | - | + | + | + |
| 5       | Stepnaya volna                                                          | Altay ARI        | 258 | 40.9 | 39.3 | - | -    | - | - | + | + | - | - |
| 98      | Avgustina                                                               | Karabalyk AES    | 257 | 43.3 | 41.0 | - | +    | + | + | - | - | + | + |
| 84      | Fiton 109                                                               | Fiton            | 257 | 40.0 | 38.1 | - | -    | - | + | + | + | + | - |
| 12<br>8 | Lutescens 128-05                                                        | Omsk SAU         | 257 | 41.6 | 33.8 | - | -    | - | - | + | - | + | + |
| 14<br>3 | Lutescens 529/00-10C                                                    | Siberian ARI     | 257 | 41.5 | 35.1 | + | +    | - | + | + | + | + | - |
| 97      | Lutescens 36                                                            | Karabalyk AES    | 257 | 43.7 | 36.1 | - | -    | - | + | + | + | + | - |
| 12<br>1 | Lutescens 205/03-1                                                      | Kurganseeds      | 255 | 41.7 | 37.6 | + | +    | - | - | + | + | + | + |

|         |                      |                    |     |      |      |   |   |   |      |   |   |   |   |
|---------|----------------------|--------------------|-----|------|------|---|---|---|------|---|---|---|---|
| 46      | Lutescens - 1235     | Karagandy ARI      | 255 | 43.3 | 36.4 | - | - | + | +    | + | + | + | + |
| 14<br>5 | Sigma                | Siberian ARI       | 254 | 43.2 | 40.5 | + | + | - | +    | + | + | + | - |
| 34      | Stepnaya 1509/06     | Aktobe AES         | 254 | 40.0 | 39.3 | - | - | - | +    | - | - | - | + |
| 67      | Lutescens 53/95-98-1 | Pavlodar ARI       | 253 | 40.3 | 35.2 | - | + | + | +    | + | + | + | + |
| 12      | Lutescens 574        | Altay ARI          | 252 | 40.8 | 36.9 | - | + | - | +    | + | + | + | + |
| 3       | Sibirskiy Aljans     | Altay ARI          | 252 | 40.7 | 38.2 | - | + | - | +    | + | + | - | + |
| 76      | Lutescens 715-04     | Kaz. Farming Inst. | 251 | 42.5 | 40.9 | - | + | - | +    | + | - | + | - |
| 22      | Novosibirskaya 31    | Novosibirsk ARI    | 251 | 40.8 | 31.2 | - | - | - | -    | - | + | - | - |
| 10<br>4 | Chelyaba yubileynaya | Chelyabinsk ARI    | 251 | 40.1 | 33.0 | - | - | - | -    | + | + | - | + |
| 10<br>3 | Ayna                 | Karabalyk AES      | 248 | 43.8 | 40.9 | - | - | - | +    | - | - | - | - |
| 89      | Fiton C-54           | Fiton              | 245 | 42.5 | 41.5 | - | - | - | +    | - | + | - | - |
| 99      | Liniya-22 ЧС         | Karabalyk AES      | 244 | 41.5 | 39.7 | - | - | + | +    | + | + | - | - |
| 9       | Lutescens 509        | Altay ARI          | 244 | 40.0 | 40.6 | - | - | - | +    | + | + | + | - |
| 72      | Iljinskaya           | Kaz. Farming Inst. | 243 | 41.0 | 35.4 | - | - | - | +    | + | + | + | + |
| 10<br>8 | Pamyati Ryuba        | Chelyabinsk ARI    | 243 | 42.3 | 39.1 | - | - | - | -    | + | + | + | - |
| 14<br>9 | Omskaya 35-2         | Siberian ARI       | 242 | 40.6 | 38.6 | - | - | - | -    | + | - | + | - |
| 13      | Lutescens 697        | Altay ARI          | 241 | 40.8 | 35.1 | - | - | - | -    | + | + | + | + |
| 2       | Altayskaya 530       | Altay ARI          | 240 | 40.3 | 37.2 | - | - | - | +    | + | + | - | + |
| 8       | Lut.509              | Altay ARI          | 238 | 40.0 | 39.2 | - | - | - | +    | - | + | + | - |
| 10<br>5 | Lutescens 23490      | Chelyabinsk ARI    | 238 | 42.0 | 35.9 | - | - | - | n.a. | + | + | - | + |
| 56      | Tselinnaya niva      | Kaz. Grain Inst.   | 237 | 43.0 | 36.7 | - | + | - | +    | + | + | + | + |
| 75      | Lutescens 24         | Kaz. Farming Inst. | 236 | 40.0 | 39.7 | - | + | - | +    | + | + | + | - |
| 10<br>0 | Liniya-4-10-16       | Karabalyk AES      | 235 | 43.3 | 33.3 | - | - | - | +    | - | + | - | + |
| 53      | Lutescens 1350       | Karagandy ARI      | 230 | 40.3 | 37.3 | - | + | - | +    | + | + | + | + |

|                                 |                         |                    |     |      |      |   |      |   |   |   |   |      |   |
|---------------------------------|-------------------------|--------------------|-----|------|------|---|------|---|---|---|---|------|---|
| 83                              | Nadezhnda               | Kaz. Farming Inst. | 229 | 40.3 | 40.2 | - | -    | - | - | - | + | +    | - |
| 13<br>6                         | Chernyava 13            | Omsk SAU           | 228 | 41.2 | 40.6 | - | -    | - | - | + | - | -    | + |
| 81                              | Kayir G-5454-91         | Kaz. Farming Inst. | 220 | 40.3 | 37.2 | - | -    | - | - | + | + | -    | + |
| 13<br>9                         | Tertsiya-1              | Omsk SAU           | 199 | 42.0 | 33.0 | - | -    | - | - | + | + | -    | - |
| 4                               | Lutescens 844           | Altay ARI          | 190 | 42.4 | 35.9 | - | +    | - | - | + | + | -    | + |
| 82                              | Kaz.stanskaya-3         | Kaz. Farming Inst. | 180 | 40.0 | 35.7 | - | -    | - | - | - | + | -    | + |
| 13<br>7                         | Sibakovskaya Yubilenaya | Omsk SAU           | 177 | 41.9 | 32.0 | - | -    | - | - | + | + | n.a. | - |
| Late heading group (44-48 days) |                         |                    |     |      |      |   |      |   |   |   |   |      |   |
| 21                              | Zauljbinka              | East-Kaz. ARI      | 327 | 44.5 | 35.7 | + | -    | + | + | - | + | -    | + |
| 6                               | Toboljskaya-1           | Altay ARI          | 302 | 44.8 | 38.4 | - | +    | - | + | + | + | +    | + |
| 7                               | Lutescens 1012          | Altay ARI          | 301 | 44.5 | 37.9 | - | +    | - | + | + | + | -    | + |
| 69                              | Pavlodarskaya 11        | Pavlodar ARI       | 298 | 44.3 | 34.6 | - | -    | - | - | + | + | +    | - |
| 40                              | LD-25                   | Saratov ARI        | 293 | 45.5 | 37.8 | - | +    | + | + | + | + | +    | + |
| 14<br>2                         | Lut. 3/04-21-11         | Siberian ARI       | 291 | 44.5 | 39.7 | + | +    | - | - | + | + | +    | + |
| 14<br>1                         | Lutescens 141/03-2      | Siberian ARI       | 291 | 45.1 | 40.5 | + | -    | - | + | - | + | +    | + |
| 12<br>0                         | Lutescens 360/96-6      | Kurganseeds        | 290 | 44.4 | 37.2 | + | +    | - | + | + | + | -    | + |
| 13<br>4                         | OmGAU-100               | Omsk SAU           | 285 | 44.5 | 36.8 | + | +    | - | - | + | + | +    | + |
| 39                              | L-654                   | Saratov ARI        | 284 | 46.2 | 33.7 | - | n.a. | + | + | + | + | -    | - |
| 10                              | Lutescens 1003          | Altay ARI          | 284 | 45.9 | 38.2 | - | +    | + | + | + | + | +    | + |
| 17                              | Velyutinum 15           | East-Kaz. ARI      | 276 | 45.5 | 32.9 | + | n.a. | + | + | + | + | +    | + |
| 44                              | Lutescens - 1212        | Karagandy ARI      | 271 | 44.5 | 39.2 | - | +    | - | + | + | + | +    | + |
| 16                              | Lutescens 716           | Altay ARI          | 270 | 44.7 | 34.0 | - | +    | - | + | + | + | +    | + |
| 15<br>0                         | Omskaya 41              | Siberian ARI       | 269 | 46.0 | 35.6 | + | n.a. | - | + | - | - | +    | + |
| 55                              | Lutescens - 1135        | Karagandy ARI      | 267 | 45.6 | 34.2 | + | n.a. | + | + | + | + | -    | + |
| 11                              | Erythrospermum 1119     | Altay ARI          | 263 | 45.1 | 37.3 | - | +    | + | + | - | + | +    | - |

|         |                   |                  |     |      |      |   |      |   |   |   |   |   |   |
|---------|-------------------|------------------|-----|------|------|---|------|---|---|---|---|---|---|
| 13<br>3 | Lutescens 96-12   | Omsk SAU         | 256 | 45.2 | 36.8 | + | -    | - | - | - | + | + | + |
| 93      | Fiton C 41 ЧС     | Fiton            | 252 | 45.8 | 40.0 | - | -    | + | + | - | + | - | + |
| 86      | Fiton 43          | Fiton            | 249 | 47.0 | 42.7 | + | +    | + | + | + | + | + | + |
| 96      | Lutescens C 19 ЧС | Karabalyk<br>AES | 239 | 47.4 | 31.1 | + | n.a. | + | - | - | + | + | - |
| 87      | Fiton C 50 ЧС     | Fiton            | 222 | 47.8 | 39.0 | + | n.a. | + | - | - | + | + | - |
